# Supplementary material
Source: PubMed Central journal article supplement (PMC5734114)
Supplement: NIHMS902491-supplement-Supplemental_Table.pdf [file NIHMS902491-supplement-Supplemental_Table.pdf]

Supplementary Table. *Observed means (standard deviations) of outcomes by time*

|        | CBCL Externalizing    | CBCL Internalizing    | Parental Stress Index  |
|--------|-----------------------|-----------------------|------------------------|
| Time 1 | 58.63 (10.40)<br>N=64 | 53.67 (9.58)<br>N=64  | 108.68 (29.33)<br>N=69 |
| Time 2 | 56.48 (12.80)<br>N=54 | 51.20 (11.80)<br>N=54 | 102.51 (24.20)<br>N=57 |
| Time 3 | 55.65 (11.24)<br>N=52 | 50.44 (10.90)<br>N=52 | 103.04 (20.38)<br>N=50 |
| Time 4 | 55.33 (11.43)<br>N=40 | 49.15 (10.94)<br>N=40 | 98.22 (24.04)<br>N=37  |
| Time 5 | 59.44 (11.03)<br>N=36 | 50.36 (11.02)<br>N=36 | 106.03 (21.96)<br>N=34 |
| Time 6 | 56.15 (11.58)<br>N=39 | 51.10 (11.62)<br>N=39 | 104.83 (23.44)<br>N=40 |
